# Supplementary material
Source: PubMed Central journal article supplement (PMC10062165)
Supplement: jvi.00011-23-s0002.pdf [file jvi.00011-23-s0002.pdf]

# Supporting Information 1 of

## **SARS-CoV-2 ORF8 protein induces endoplasmic reticulum stress-like responses and facilitates virus replication by triggering Calnexin: an unbiased study**

Xuefeng Wang<sup>1,a</sup>, Wenqi Wang<sup>2,3,a</sup>, Tiecheng Wang<sup>1,2,4</sup>, Jianzhong Wang<sup>5</sup>, Yuhang Jiang<sup>1,6</sup>, Xue Wang<sup>1,2</sup>, Ze Qiu<sup>1,2</sup>, Na Feng<sup>1</sup>, Weiyang Sun<sup>1</sup>, Chang Li<sup>1</sup>, Songtao Yang<sup>1</sup>, Xianzhu Xia<sup>1,4</sup>, Hongbin He<sup>2,\*</sup> and Yuwei Gao<sup>1,\*</sup>

<sup>1</sup>Changchun Veterinary Research Institute, Chinese Academy of Agricultural Sciences, Changchun, China, 130122

<sup>2</sup>Ruminant Diseases Research Center, College of Life Sciences, Shandong Normal University, Jinan, China, 250014

<sup>3</sup>College of life sciences, Northeast Normal University, Changchun, China, 130021

<sup>4</sup>Jiangsu Co-innovation Center for Prevention and Control of Important Animal Infectious Diseases and Zoonoses, Yangzhou University, Yangzhou, China, 225009

<sup>5</sup>College of Veterinary Medicine, Jilin Agricultural University, Changchun, China, 130118

<sup>6</sup>Collage of Veterinary Medicine, Northwest A&F University, Xianyang, China, 712100

<sup>a</sup>These authors contributed equally to the work.

\*Correspondence: yuwei0901@outlook.com (YG) and hongbinhe@sdsu.edu.cn (HH)



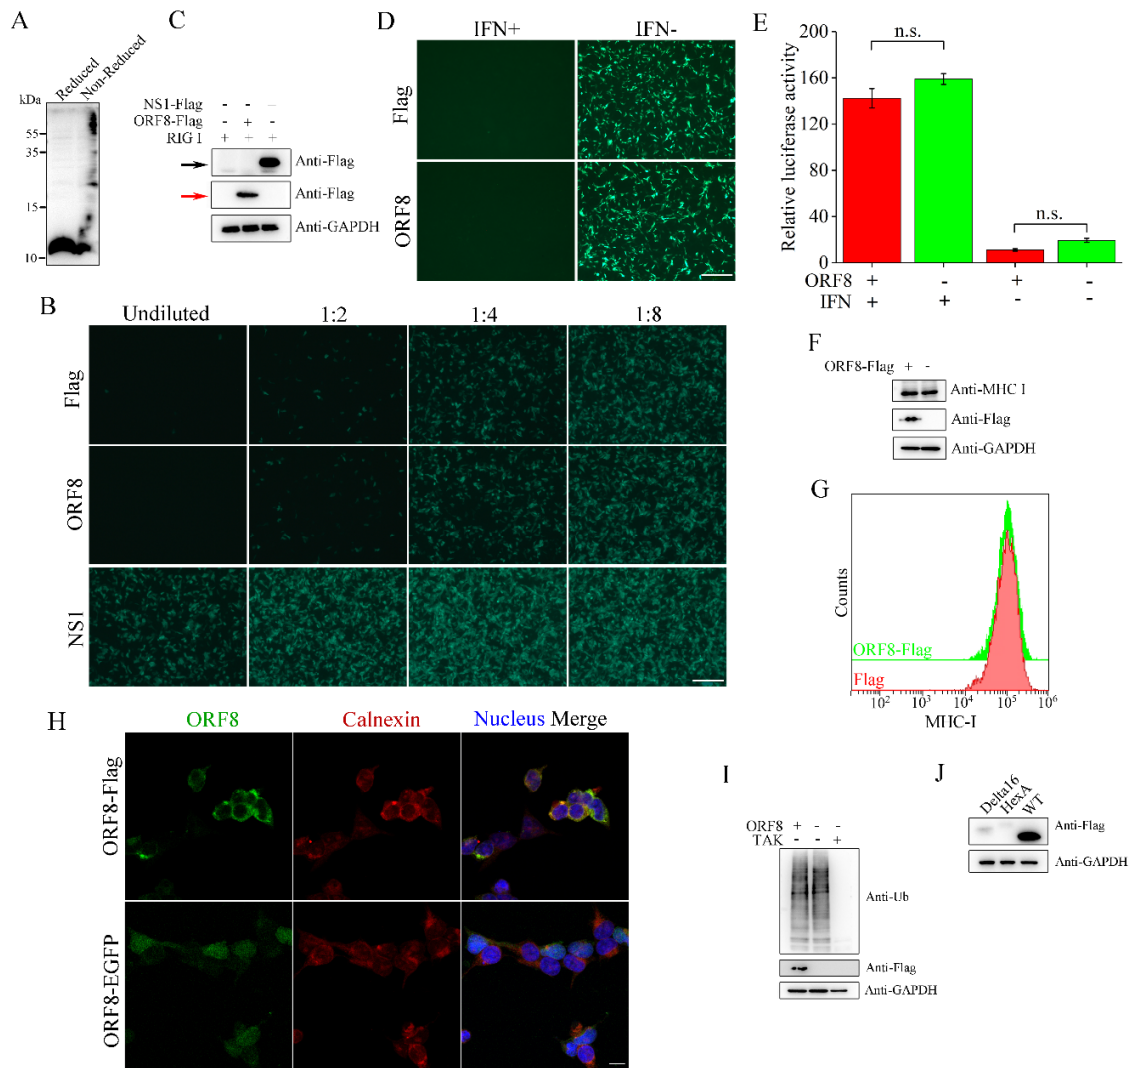

**Fig S2. ORF8 fails to function as an immune antagonist.** (A) ORF8 from mammalian cells fails to form a stable disulfide-linked homodimer. Lysates of ORF8-Flag overexpressing 293T cells were analyzed by anti-Flag WB after tricine gel electrophoresis in either reduced or non-reduced condition. (B-C) ORF8 fails to suppress IFN production, demonstrated by NDV-GFP assay (B) although both NS1 (in C, black arrow) and ORF8 (in C, red arrow) are well-expressed. Scale bars in (B) and (D): 300  $\mu$ m. (D-E) ORF8 fails to suppress IFN signaling, demonstrated by NDV-GFP assays (D) and ISRE responses (E). (F-G) ORF8 fails to inhibit MHC-I expression. (F) ORF8 was overexpressed in 293T for 60 hours cells, and lysates were analyzed by WB. (G) Cells in (F) were analyzed by flow cytometry. (H) ORF8-EGFP fails to co-localize with Calnexin. ORF8-Flag and

ORF8-EGFP overexpressing 293T cells were analyzed by multi-immunofluorescence. Left row: ORF8 signals in green; middle row: Calnexin signals in green; right row: merge signals of left and middle with nucleus in blue. Scale bar: 15  $\mu$ m. (I) ORF8 fails to inhibit ubiquitination. Lysates of ORF8 overexpressing or TAK treated 293T were analyzed by WB. (J) ORF8 mutants Delat16 and HexA were expressed in low levels. Lysates of ORF8 WT and mutant overexpressing 293T cells were analyzed by WB after tricine gel electrophoresis.

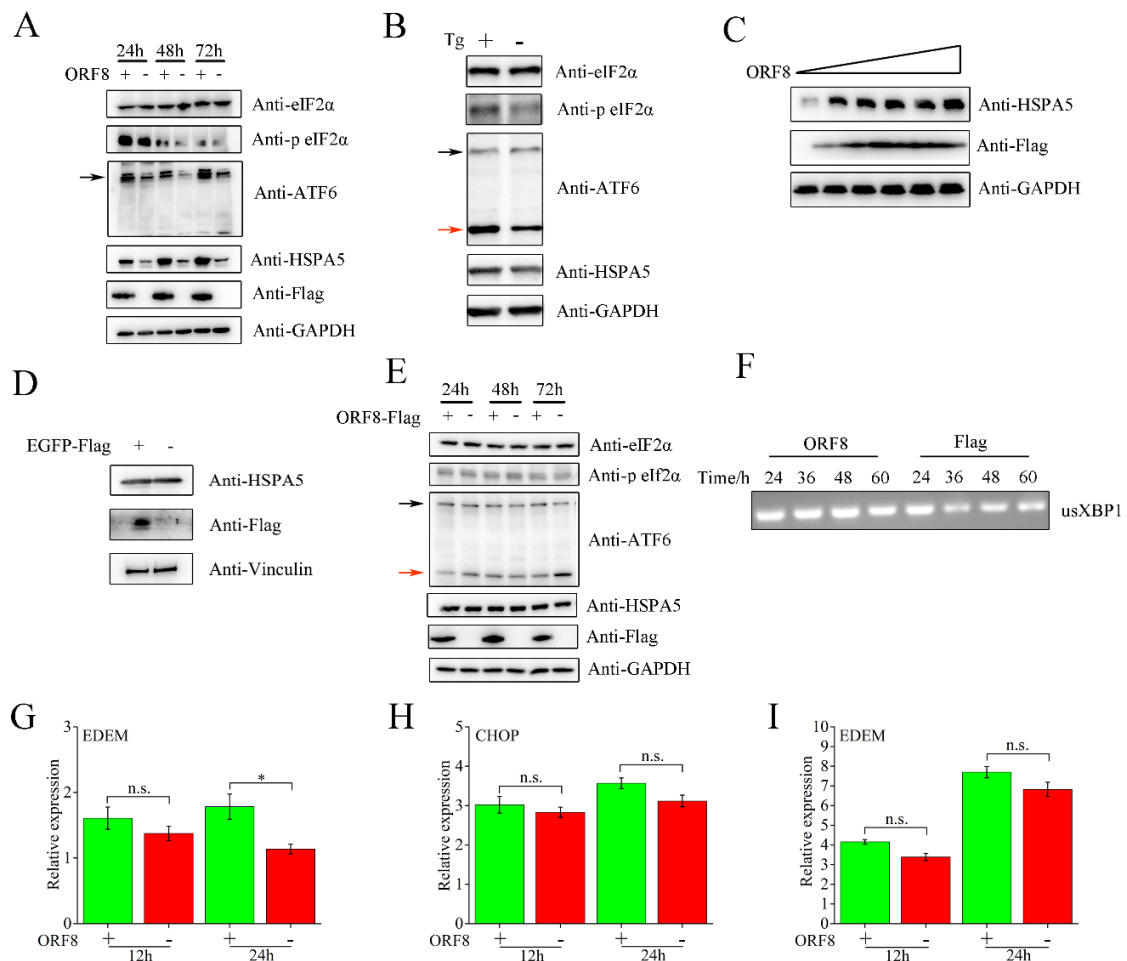

**Fig S3. ORF8 leads to stress-like responses in human but not in mouse cells.** (A) ORF8 induces HSPA5 upregulation via neither PERK nor ATF6 branch. 293T cells were transfected with ORF8 and lysates were obtained at the indicated time post transfection and analyzed by WB. In anti-ATF6

WB results (A), (B) and (D), full-length ATF6 is marked by black arrows and ATF6(N) is marked by red arrows. (B) Tg induces ER stress of three branches. As is in (A) but using HeLa cells treated by Tg. (C) A tiny amount of ORF8 is able to induce stress-like response. 293T cells in 6-well plates were transfected with 0, 100, 200, 1000, 2500 and 5000 ng ORF8 (from left to right lanes), respectively, and lysates were obtained at 60 hours post transfection and analyzed by WB. (D) EGFP overexpression fails to induce HSPA5 upregulation in 293T cells. (E) ORF8 fails to activate PERK or ATF6 branch of ER stress in MEF cells. As is in (A) but using MEF cells. (F) ORF8 fails to activate IRE1 branch of ER stress in MEF cells. As is in Figure 5B but using MEF cells. (G-I) Influence of ORF8 overexpression in 293T cells (G), or MEF cells (H-I). As is in Figure 5D. Not significant: n.s..

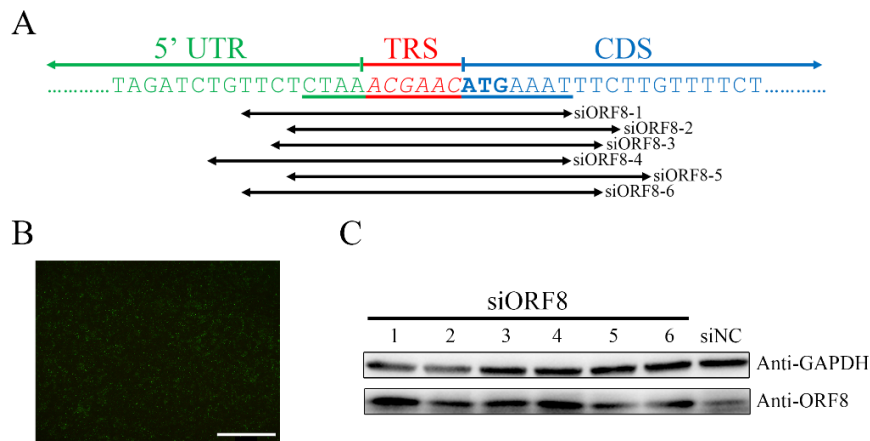

**Fig S4. ORF8 siRNAs fail to knockdown ORF8.** (A) Designs of 6 ORF8 specific siRNAs according to the sequence of ORF8 sgRNA. (B) Successful transfection of siORF8. Scale bar: 400 μm. (C) ORF8 siRNAs fail to knockdown ORF8. HeLa<sup>ACE2+</sup> cells were transfected using each siORF8/siNC for 48 hours, and infected by SARS-CoV-2 at an MOI of 1. WB analyses were performed at 24 hpi.

**Table S1. Details for ORF8-Calnexin docking**

| Name                        | Distance | Category                     | Types                          | From          | From Chemistry    | To           | To Chemistry         |
|-----------------------------|----------|------------------------------|--------------------------------|---------------|-------------------|--------------|----------------------|
| A:LYS90:HZ1 - B:ASP107:OD2  | 2.26938  | Hydrogen Bond; Electrostatic | Salt Bridge; Attractive Charge | A: LYS90:HZ1  | H-Donor; Positive | B:ASP107:OD2 | H-Acceptor; Negative |
| A:ARG221:NH2 - B:GLU19:OE2  | 4.93241  | Electrostatic                | Attractive Charge              | A: ARG221:NH2 | Positive          | B:GLU19:OE2  | Negative             |
| A:GLY195:H - B:ILE39:O      | 2.89138  | Hydrogen Bond                | Conventional Hydrogen Bond     | A: GLY195:H   | H-Donor           | B:ILE39:O    | H-Acceptor           |
| A:HIS201:HE2 - B:GLU110:OE1 | 2.25439  | Hydrogen Bond                | Conventional Hydrogen Bond     | A:HIS201:HE2  | H-Donor           | B:GLU110:OE1 | H-Acceptor           |
| B:HIS40:HE2 - A:GLU159:OE2  | 2.94436  | Hydrogen Bond                | Conventional Hydrogen Bond     | B:HIS40:HE2   | H-Donor           | A:GLU159:OE2 | H-Acceptor           |
| B:HIS40:HE1 - A:GLU159:OE2  | 3.09197  | Hydrogen Bond                | Carbon Hydrogen Bond           | B:HIS40:HE1   | H-Donor           | A:GLU159:OE2 | H-Acceptor           |
| A:ARG221:NH2 - B:HIS112     | 4.26075  | Electrostatic                | Pi-Cation                      | A: ARG221:NH2 | Positive          | B:HIS112     | Pi-Orbitals          |
| A:ASP192:OD1 - B:PHE104     | 4.24739  | Electrostatic                | Pi-Anion                       | A: ASP192:OD1 | Negative          | B:PHE104     | Pi-Orbitals          |
| A:ASP197:OD2 - B:HIS112     | 3.36826  | Electrostatic                | Pi-Anion                       | A: ASP197:OD2 | Negative          | B:HIS112     | Pi-Orbitals          |
| B:GLU110:OE2 - A:TYR164     | 4.20693  | Electrostatic                | Pi-Anion                       | B: GLU110:OE2 | Negative          | A:TYR164     | Pi-Orbitals          |
| B:GLU110:OE2 - A:HIS201     | 3.24915  | Electrostatic                | Pi-Anion                       | B: GLU110:OE2 | Negative          | A:HIS201     | Pi-Orbitals          |

|                           |         |             |           |             |             |          |             |
|---------------------------|---------|-------------|-----------|-------------|-------------|----------|-------------|
| A:CYS160:SG -<br>B:PHE104 | 4.36697 | Other       | Pi-Sulfur | A:CYS160:SG | Sulfur      | B:PHE104 | Pi-Orbitals |
| A:CYS194:SG -<br>B:PHE104 | 5.21006 | Other       | Pi-Sulfur | A:CYS194:SG | Sulfur      | B:PHE104 | Pi-Orbitals |
| B:HIS40 -<br>A:CYS160     | 4.66622 | Hydrophobic | Pi-Alkyl  | B:HIS40     | Pi-Orbitals | A:CYS160 | Alkyl       |
| B:HIS40 -<br>A:MET429     | 4.82283 | Hydrophobic | Pi-Alkyl  | B:HIS40     | Pi-Orbitals | A:MET429 | Alkyl       |
| B:PHE41 -<br>A:CYS194     | 4.39346 | Hydrophobic | Pi-Alkyl  | B:PHE41     | Pi-Orbitals | A:CYS194 | Alkyl       |

**Table S2. Primer applications and sequences**

| <b>Primer applications</b>                              | <b>Primer sequences (5' to 3')</b> |
|---------------------------------------------------------|------------------------------------|
| RT-PCR for Human XBP-1 splicing                         | CCTGTAGTTGAGAACCAGG                |
|                                                         | GGGGCTTGGTATATATGTGG               |
| qRT-PCR for Human CHOP                                  | ACCTCCTGGAAATGAAGAGGAAG            |
|                                                         | GCTCTGACTGGAATCTGGAGAG             |
| qRT-PCR for Human EDEM                                  | TATCTCCTCTACCAGGCAACCA             |
|                                                         | GGACTTGTCAATGACGTGATGC             |
| qRT-PCR for Human HSPA5                                 | CAACGCCAAGCAACCAAAGA               |
|                                                         | GTTCTTCTCCCCCTCCCTCT               |
| qRT-PCR for Human PDIA4                                 | AGCAGGGCTCCACCCA                   |
|                                                         | CCTGGTGTAGCGCTTAGCAT               |
| RT-PCR for Mouse XBP-1 splicing                         | GAACCAGGAGTTAAGAACACG              |
|                                                         | AGGCAACAGTGTCAGAGTCC               |
| qRT-PCR for Mouse CHOP                                  | CCCAGGAAACGAAGAGGAAGAA             |
|                                                         | CTCTGACTGGAATCTGGAGAGC             |
| qRT-PCR for Mouse EDEM                                  | TATCTCCTCTACCAGGCAACCA             |
|                                                         | TCTATGACGTGATGCAGCGTAG             |
| site-directed mutagenesis to construct pCAGGS-Flag-Stop | ACGACGATAATATTCGAGCTCATC           |
|                                                         | CATCCTTGTAATCCATGG                 |
| PCR to linearize pCAGGS-Flag-Stop                       | GATTACAAGGATGACGACGATAAG           |
|                                                         | GATGAGACAGCACAAACAACCAG            |



|                                                            |                                                       |
|------------------------------------------------------------|-------------------------------------------------------|
| RT-PCR to construct ORF8-Flag                              | TTGTGCTGTCTCATCATGAAATTTCTTGTTTTCTTAGG                |
|                                                            | GTCATCCTTGTAATCGATGAAATCTAAAACAACACGAAC               |
| subcloned PCR to construct ORF8-EGFP                       | GGCGCTAGCATGAAATTTCTTGTTTTCTTAGGAATCATC               |
|                                                            | CTTGGATCCCGGATGAAATCTAAAACAACACGAACG                  |
| site-directed mutagenesis to construct ORF8-T12R           | TGTTTTCTTAGGAATCATCACAAGAGTAGCTGCATTTACCAAGAATG       |
|                                                            | CATTCTTGGTGAAATGCAGCTACTCTTGTGATGATTCCTAAGAAAACA      |
| site-directed mutagenesis to construct ORF8-V13A           | ATTCTTGGTGAAATGCAGCTGCAGTTGTGATGATTCCTAAG             |
|                                                            | CTTAGGAATCATCACAACACTGCAGCTGCATTTACCAAGAAT            |
| site-directed mutagenesis to construct ORF8-A15R           | CTGTAAACTACATTCTTGGTGAAATCTAGCTACAGTTGTGATGATTCCTAAG  |
|                                                            | CTTAGGAATCATCACAACACTGTAGCTAGATTTACCAAGAATGTAGTTTACAG |
| site-directed mutagenesis to construct ORF8-V13R           | CTTGGTGAAATGCAGCTCTAGTTGTGATGATTCCTAAGAAAACAAGAAATTT  |
|                                                            | AAATTTCTTGTTTTCTTAGGAATCATCACAACACTAGAGCTGCATTTACCAAG |
| site-directed mutagenesis to construct ORF8-△SR            | ACGACGATAATATTCGAGCTCATC                              |
|                                                            | CATCCTTGTAATCCATGG                                    |
| site-directed mutagenesis to construct ORF8-SR (1st round) | TATATTAGAGTAGGAGCTAG                                  |
|                                                            | TTCTTGGTGAAATGCAGC                                    |
| site-directed mutagenesis to construct ORF8-SR (2nd round) | GATTACAAGGATGACGAC                                    |
|                                                            | AGGTAAACAGGAAACTGTATAATTAC                            |
| site-directed mutagenesis to construct ORF8-N78Q           | CGATATCGGTCAATATACAGTTTCCTG                           |
|                                                            | ATGTACTIONGAATGGGTGATTTAG                             |
| RT-PCR to construct HSPA5-HA                               | TAAAAGCTTATTATGAAGCTCTCCCTGGTGGC                      |
|                                                            | TCTCGAGCAACTCATCTTTTTCTGCTGTATCC                      |
| RT-PCR to construct Calnexin-HA                            | ATTGGATCCATTATGGAAGGGAAGTGGTTGCTGT                    |

|                                                                                |                                             |
|--------------------------------------------------------------------------------|---------------------------------------------|
|                                                                                | TCTCGAGCTCTCTTCGTGGCTTTCTGTTTCTT            |
| RT-PCR to construct TUBB-HA                                                    | ATCAAGCTTATTATGGACTCTGTTTCGCTCAGGTCCTT      |
|                                                                                | TCTCGAGGGCCTCCTCTTCGGCCTCCTC                |
| RT-PCR to construct TUBA1B-HA                                                  | ATTGGATCCATTATGCGTGAGTGCATCTCCATCC          |
|                                                                                | TCTCGAGGTATTCTCTCCTTCTTCCTCACCC             |
| RT-PCR to construct PDIA6-HA                                                   | TTCAAGCTTATTATGATCTTAGGTCTGGTGAGCTGTA       |
|                                                                                | TCTCGAGCAACTCATCTTCCCTAAGTCATCA             |
| RT-PCR to construct EEF1A1-HA                                                  | ATTGGATCCATTATGGGAAAGGAAAAGACTCATATCA       |
|                                                                                | TCTCGAGTTTAGCCTTCTGAGCTTTCTGGG              |
| site-directed mutagenesis to construct Calnexin- $\Delta$ Globular (1st round) | CTGCTCAATGACATGACTC                         |
|                                                                                | GAGCTTTGTAAGTAACCTTG                        |
| site-directed mutagenesis to construct Calnexin- $\Delta$ Globular (2nd round) | AAGAAAGCTGCTGATGGG                          |
|                                                                                | AGGTTCCAGATCTTCAAAG                         |
| site-directed mutagenesis to construct Calnexin- $\Delta$ Arm                  | TTCAGAATGACTCCTTTTAG                        |
|                                                                                | ATTCCACTATTCACCAC                           |
| site-directed mutagenesis to construct Calnexin- $\Delta$ Ctem                 | CTCGAGTCTAGAGGGCCC                          |
|                                                                                | CAGGCCCCATCCATCATTG                         |
| site-directed mutagenesis to construct Calnexin-Arm (1st round)                | ATAGAATTCGCCACCATGGAAGGGAAGTG               |
|                                                                                | GTGAAGGATTTACAGGATCAATCACATCATCATGTCCATCATG |
| site-directed mutagenesis to construct Calnexin-Arm (2nd round)                | TGATGATGTGATTGATCCTGTAAATCCTTACGTGAAATTGAGG |
|                                                                                | AGGTTCCAGATCTTCAAAGAAATCTGGATTTGCTCGAGATA   |
| homologous recombination to construct Calnexin-Ctem (N-terminal part)          | AATGAATTCGCCACCATGGAAGGGAAGTGGTTGCTG        |
|                                                                                | TCTCGAGATCAATCACATCATCATGTCCA               |

|                                                                           |                                                        |
|---------------------------------------------------------------------------|--------------------------------------------------------|
| homologous recombination to construct Calnexin-Ctem (C-terminal part)     | ATGATGATGATGTGATTGATAAGAAAGCTGCTGATGGGGC               |
|                                                                           | TAGGGCCCTCTAGACTCGAGCTCTCTTCGTGGCTTTCTGT               |
| homologous recombination to construct Calnexin-Globular (N-terminal part) | AATGAATTCGCCACCATGGAAGGGAAGTGGTTGCTG                   |
|                                                                           | TCTCGAGATTTCCACTATTCACCACAGATTGG                       |
| homologous recombination to construct Calnexin-Globular (C-terminal part) | CTGTGGTGAATAGTGGAAATTTAGAATGACTCCTTTTAG                |
|                                                                           | TAGGGCCCTCTAGACTCGAGCAGGCCCATCCATCATTGG                |
| site-directed mutagenesis to construct HSPA5- $\Delta$ NBD                | CAAGATACAGGTGACCTG                                     |
|                                                                           | CTTCTTGTCTCCTCCTC                                      |
| site-directed mutagenesis to construct HSPA5- $\Delta$ SBD                | AAACTCTATGGAAGTGCAGGCCCTC                              |
|                                                                           | TACATCAAGCAGTACCAGGTCACCTG                             |
| site-directed mutagenesis to construct HSPA5- $\Delta$ N                  | AAACCATACATTC AAGTTGATATTGGAGGTGGGCAAACAAAGACATTTGCTCC |
|                                                                           | CTCCTCGGCCCGCGCCGC                                     |
| site-directed mutagenesis to construct HSPA5- $\Delta$ core NBD           | GACAATAGAGCTGTGCAGAAACTCCGG                            |
|                                                                           | AGTTTTCTTTTCAACCACCTTGAACGGC                           |
| site-directed mutagenesis to construct HSPA5- $\Delta$ core SBD           | TTTGAGATAGATGTGAATGG                                   |
|                                                                           | TACATCAAGCAGTACCAG                                     |

**Table S3. Antibodies information**

| <b>Antibody Name</b> | <b>Vendor</b>  | <b>Application</b> |
|----------------------|----------------|--------------------|
| Anti-HA              | Biolegend      | WB                 |
| Anti-Flag            | Sigma          | WB                 |
| Anti-eIf2 $\alpha$   | Cell Signaling | WB                 |
| Anti-p eIf2 $\alpha$ | Cell Signaling | WB                 |
| Anti-Calneixn        | Cell Signaling | WB                 |
| Anti-Calnexin        | Abcam          | IP/IF              |
| Anti-HSPA5           | Proteintech    | WB/IP/IF           |
| Anti-beta tubulin    | Cell Signaling | WB/IF              |
| Anti-GAPDH           | Cell Signaling | WB                 |
| Anti-GM130           | Abcam          | IF                 |
| Anti-ATF6            | Novus          | WB                 |
| Anti-MHC I           | Abcam          | WB                 |
| Anti-CD63            | Santa Cruz     | WB                 |
| Anti-Ubiquitin       | Cell Signaling | WB                 |

**Table S4. siRNA information**

| Name         | Sequences (5' to 3') |                             |
|--------------|----------------------|-----------------------------|
| siORF8-1     | sense                | UUCUCUAAACGAACAUGAAAUdTdT   |
|              | antisense            | AUUUCAUGUUCGUUUAGAGAAdTdT   |
| siORF8-2     | sense                | UCUAAACGAACAUGAAAUUUCdTdT   |
|              | antisense            | GAAAUUUCAUGUUCGUUUAGAdTdT   |
| siORF8-3     | sense                | CUCUAAACGAACAUGAAAUUdTdT    |
|              | antisense            | AAAUUUCAUGUUCGUUUAGAGdTdT   |
| siORF8-4     | sense                | UGUUCUCUAAACGAACAUGAAAUdTdT |
|              | antisense            | AUUUCAUGUUCGUUUAGAGAACAdTdT |
| siORF8-5     | sense                | UCUAAACGAACAUGAAAUUUCUdTdT  |
|              | antisense            | AAGAAAUUUCAUGUUCGUUUAGAdTdT |
| siORF8-6     | sense                | UUCUCUAAACGAACAUGAAAUUdTdT  |
|              | antisense            | AAAUUUCAUGUUCGUUUAGAGAAdTdT |
| siCalnexin-1 | sense                | CACCAGAACUCAACCGGAUCAGUU    |
|              | antisense            | AACUGAUCCAGGUUGAGUUCUGGUG   |
| siCalnexin-2 | sense                | UGUGGUGGUGCCUAUGUGATT       |
|              | antisense            | UCACAUAGGCACCACCACAUU       |
| siNC         | Sense                | UUCUCCGAACGUGUCACGUTT       |
|              | antisense            | ACGUGACACGUUCGGAGAATT       |
